# Supplementary material for: The Co-Occurrence of Sexsomnia, Sleep Bruxism and Other Sleep Disorders
Source: MDPI journal article supplement (doi:10.3390/jcm7090233), 2018-08-23
Supplement: s1 [file s1]

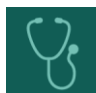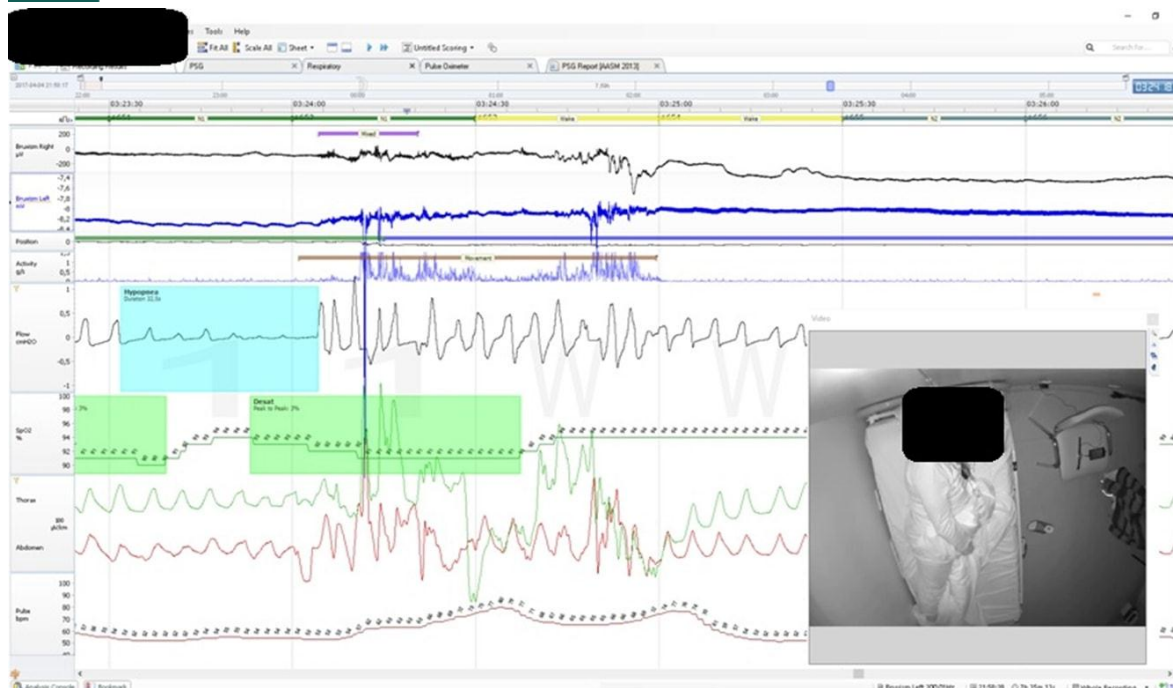

**Figure S1.** Sexsomnia episode on N1/N2 transition with bruxism activity preceding the episode.

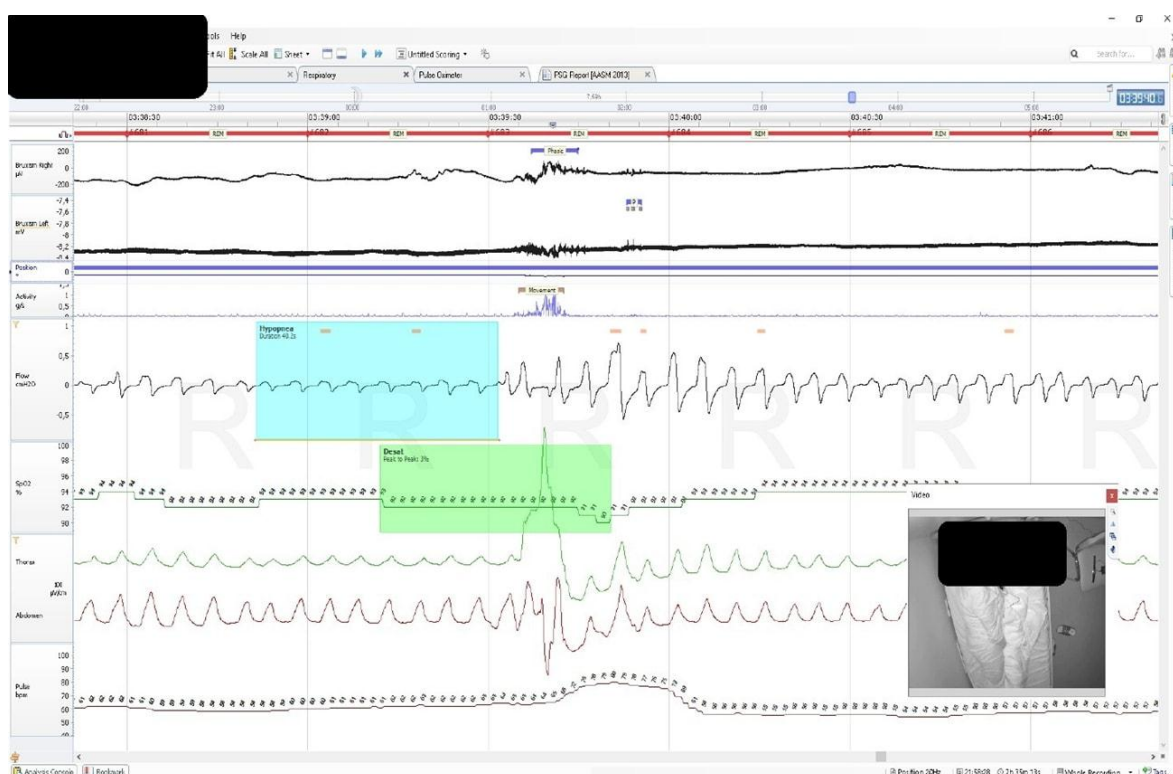

**Figure S2.** Bruxism episode followed by sexsomnia in REM sleep.

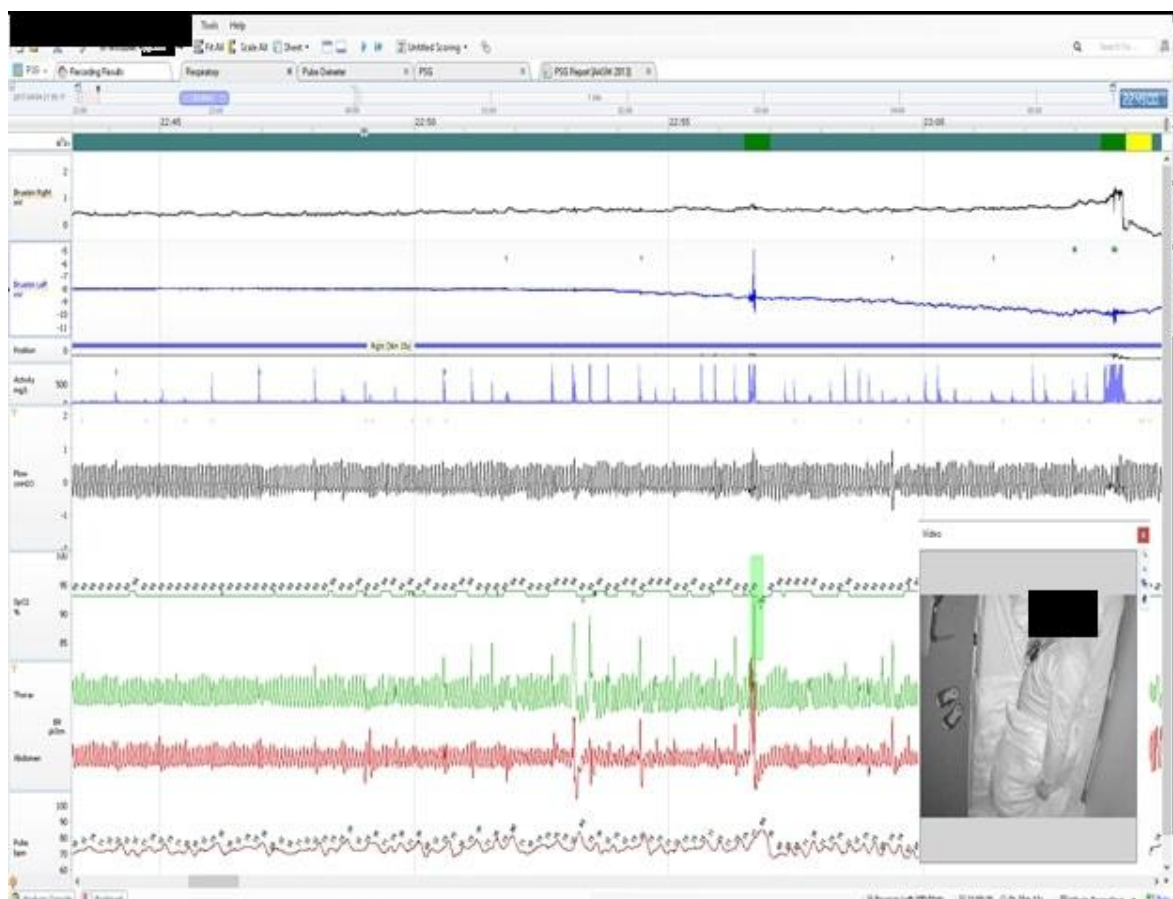

Figure S3. Myoclonic activity—21 min episode.

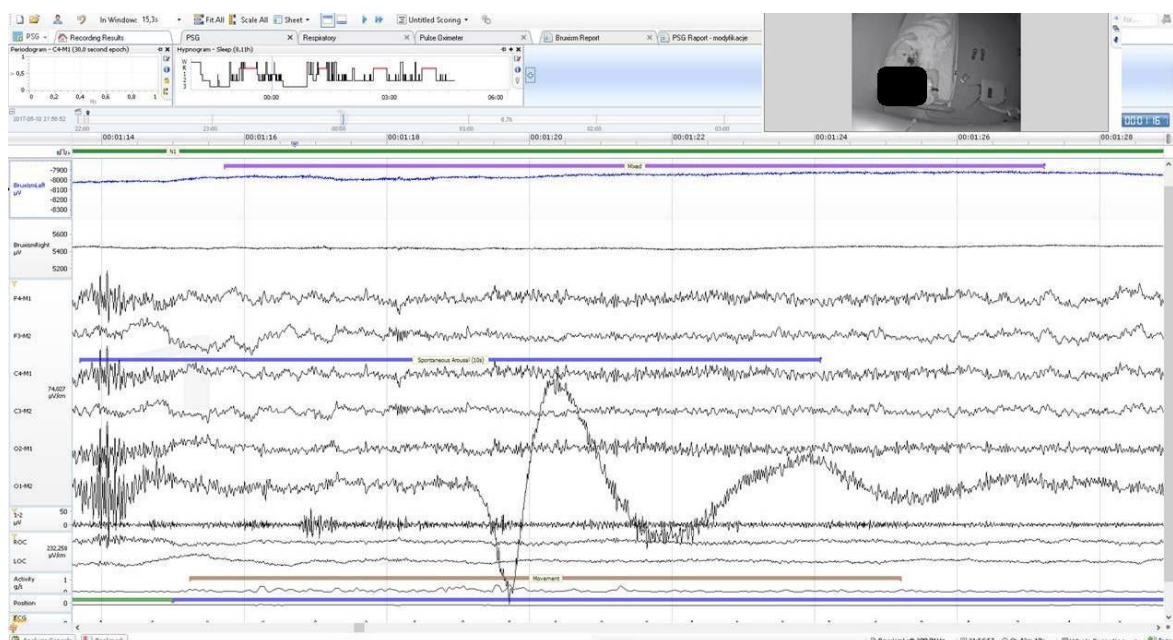

Figure S4. EEG of a single sexsomnia event.

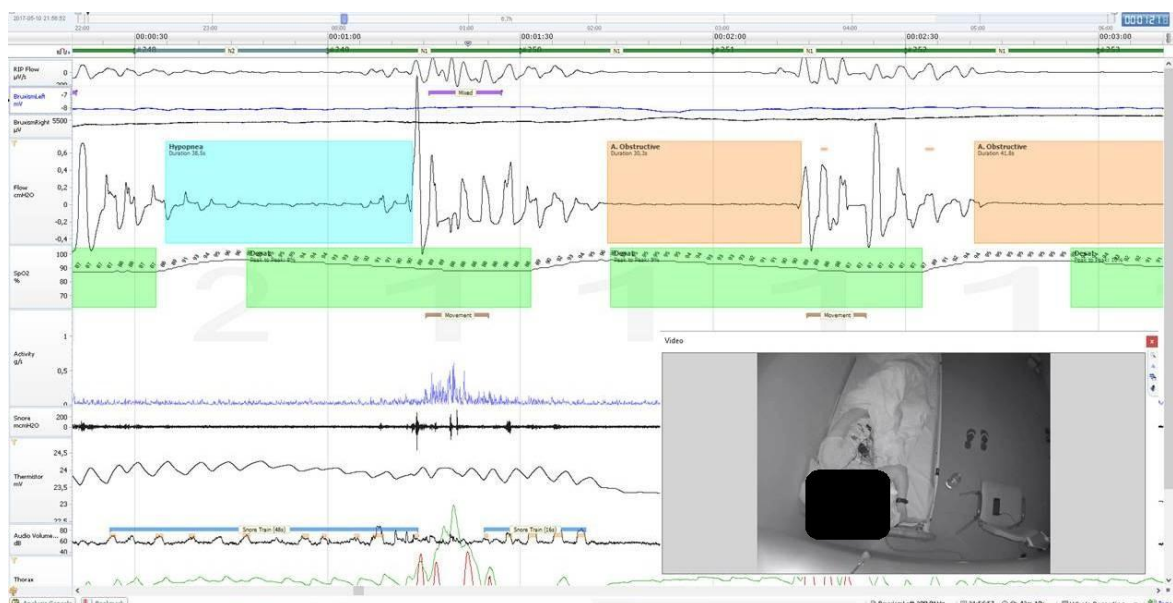

Figure S5. First two sexsomnia events.

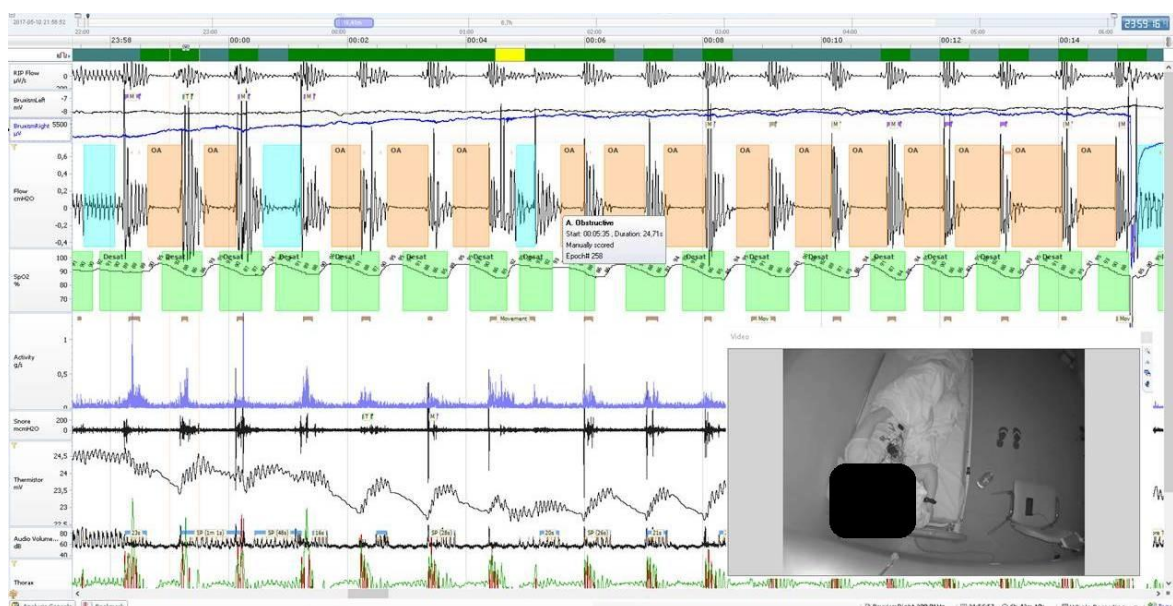

Figure S6. Whole sexsomnia episode.
